# Supplementary material for: The 2020 elephant die-off in Botswana
Source: PeerJ. 2021 Jan 11;9:e10686. doi: 10.7717/peerj.10686 (PMC7808262; doi:10.7717/peerj.10686)
Supplement: Supplemental Information 2 [file peerj-09-10686-s002.xlsx]

## Sheet: Raw data
Area	Year	Estimate	95% CL	Variance	Source	Comments
NG11,12&13	1996	3782	3961.17	4084441	DWNP 1996
NG11,12&13	1999	3886	5188.13	7006609	DWNP 1999
NG11,12&13	2001	13173	12455.9	40386025	DWNP 2001
NG11,12&13	2002	6660	5254.77	7187761	DWNP 2002
NG11,12&13	2003	5261	4690.29	5726449	DWNP 2003
NG11,12&13	2004	11870	8135.97	17230801	DWNP 2004
NG11,12&13	2005	5088	4782.5	5953600	DWNP 2005
NG11,12&13	2006	9212	6969.77	12645136	Songhurst et al. 2015
NG11,12&13	2008	9963	2293.3	1368900	Songhurst et al. 2015
NG11,12&13	2010	15027	3935.69	4032064	Songhurst et al. 2015
NG11,12&13	2013	11760	NA	NA	Pozo et al. 2017	No error estimates, thus excluded from analyses
NG11,12&13	2014	12779	2591.37894823072	5244100	Chase et al. 2014
NG11,12&13	2018	15242	2765.64635348291	5973136	Chase et al. 2018
Adjacent	1996	26984	9010.13	21132409	DWNP 1996
Adjacent	1999	39444	11783.53	36144144	DWNP 1999
Adjacent	2001	36123	8912.13	20675209	DWNP 2001
Adjacent	2002	30084	8639.69	19430464	DWNP 2002
Adjacent	2003	32072	8990.53	21040569	DWNP 2003
Adjacent	2004	32988	6991.33	12723489	DWNP 2004
Adjacent	2005	44940	12193.17	38700841	DWNP 2005
Adjacent	2010	25077	2931.10544752459	20127658.3456307	Chase 2011
Adjacent	2014	21577	2511.41333333333	14776336	Chase et al. 2014
Adjacent	2018	24898	2840.69333333333	18905104	Chase et al. 2018
